# Supplementary material
Source: PubMed Central journal article supplement (PMC5860620)
Supplement: kwx204wisewebmaterialfinal.pdf [file kwx204wisewebmaterialfinal.pdf]

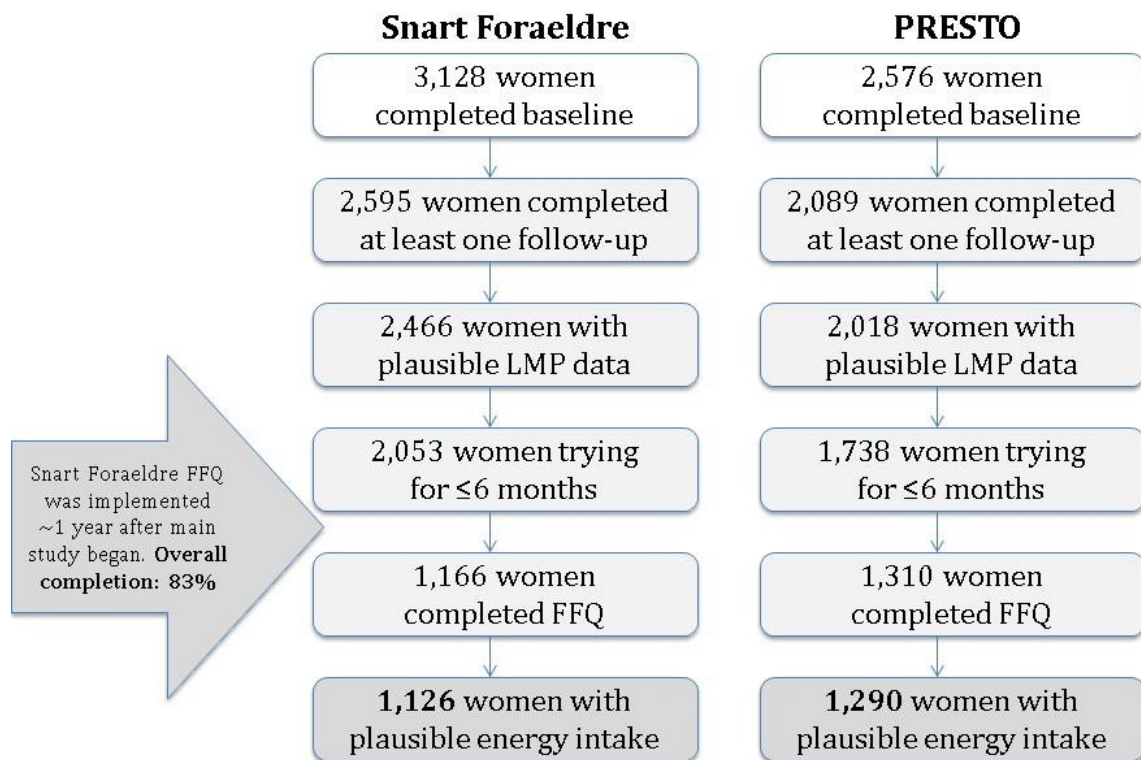

Web Figure 1. Flowchart of Participant Exclusions in the Snart Forældre and PRESTO Dietary Fat Analyses, Denmark, U.S., and Canada, 2013-2016.

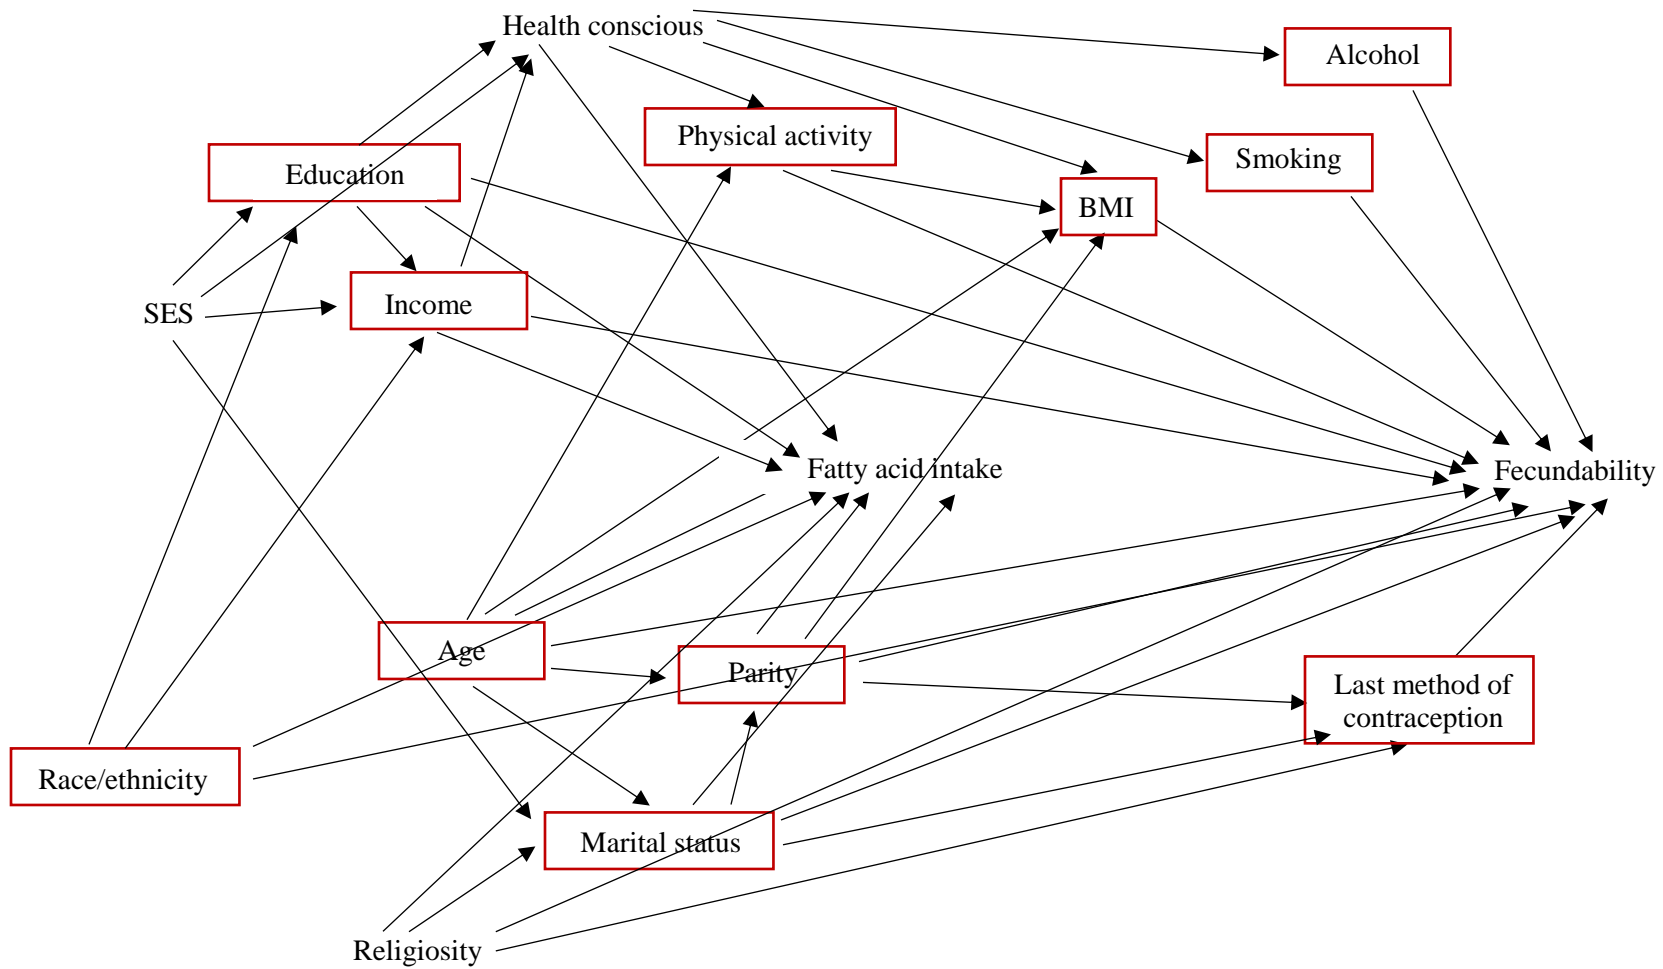

Web Figure 2. Proposed directed acyclic graph demonstrating putative confounding variables of association between fatty acid intake and fecundability.

Web Table 1. Top 5 food contributors to each type of fatty acid, PRESTO and Snart Forældre cohorts, Denmark, U.S., and Canada, 2013-2016.

|                     | PRESTO                 | Snart Forældre                  |
|---------------------|------------------------|---------------------------------|
| Saturated fat       | Cheese                 | Margarine 80% <sup>a</sup>      |
|                     | Mexican mixtures       | Cheese                          |
|                     | Butter                 | Meat, Pork                      |
|                     | Pizza                  | Cream and creme fraiche         |
|                     | Eggs                   | Butter                          |
| Monounsaturated fat | Olive oil              | Margarine 80% <sup>a</sup>      |
|                     | Whole nuts and seeds   | Pork                            |
|                     | Eggs                   | Beef                            |
|                     | Avocado/guacamole      | Olive oil                       |
|                     | Cheese                 | Cheese                          |
| Polyunsaturated fat | Whole nuts and seeds   | Margarine 80% <sup>a</sup>      |
|                     | Regular salad dressing | Bread, Rye                      |
|                     | Chicken                | Poultry                         |
|                     | Eggs                   | Grapeseed Oil                   |
|                     | Regular chips          | Eggs                            |
| Trans fatty acids   | Fried potatoes         | Cheese                          |
|                     | Macaroni and cheese    | Blended spread                  |
|                     | Chicken                | Cream and creme fraiche         |
|                     | Beef                   | Butter                          |
|                     | Mexican mixtures       | Beef                            |
| Omega-3 fatty acids | Regular salad dressing | Margarine 80% <sup>a</sup>      |
|                     | Fish                   | Fish, Oily                      |
|                     | Eggs                   | Bread, Rye                      |
|                     | Chicken                | Mayonnaise                      |
|                     | Regular chips          | Vegetables, Coarse <sup>b</sup> |
| Omega-6 fatty acids | Whole nuts and seeds   | Margarine 80% <sup>a</sup>      |
|                     | Regular salad dressing | Bread, Rye                      |
|                     | Eggs                   | Grapeseed Oil                   |
|                     | Chicken                | Poultry                         |
|                     | Regular chips          | Pork                            |

<sup>a</sup> “80%” refers to the total percent total fat in the product, with all fat being vegetable fat.

<sup>b</sup> Vegetables with  $\geq 1.9$  g/100g fiber content.
